# Supplementary material for: A general mechanism for drug promiscuity: Studies with amiodarone and other antiarrhythmics
Source: PubMed Central journal article supplement — J Gen Physiol. 2015 Dec;146(6):463–75. doi: 10.1085/jgp.201511470 (PMC4664825; doi:10.1085/jgp.201511470), 2015-12
Supplement: supp_jgp.201511470_JGP_201511470_sm.pdf [file supp_jgp.201511470_JGP_201511470_sm.pdf]

Rusinova et al., <http://www.jgp.org/cgi/content/full/jgp.201511470/DC1>

## Methods

For the GBFA, after mixing phospholipids in chloroform and gA in methanol, the solvents were removed under a stream of nitrogen gas followed by overnight desiccation under vacuum. The lipids were hydrated at room temperature in 100 mM NaNO<sub>3</sub>, 10 mM HEPES, and 25 mM ANTS, pH 7.0 buffer solution. LUVs were formed by five to six freeze–thaw cycles, extrusion was performed through 100-nm pore-size polycarbonate filters (GE Healthcare), and the extravesicular ANTS was removed using PD-10 columns (GE Healthcare). gA channel activity was monitored by stopped-flow spectrofluorometry using a SX-20 stopped-flow spectrofluorometer (Applied Photophysics), where the ANTS-loaded LUVs are mixed with the gA channel–permeant quencher of ANTS fluorescence thallium (Tl<sup>+</sup>).

In the single-channel experiments, the electrolyte solution was 1 M NaCl and 10 mM HEPES, pH 7. Once the bilayer was formed and deemed to be stable, ~24 and ~4 pmol gA<sup>-</sup>(13) and gA(15), respectively, were added to both sides of the bilayer, and the system was equilibrated for 30 min before control current traces were recorded. Approximately fourfold more gA(15) was added to the DC<sub>18:1</sub>PC/bSM/Chol bilayers to achieve comparable control appearance frequency (*f*). DMSO added with antiarrhythmics did not exceed 1% (vol/vol), a concentration that has no effect on gA channel function (Ingólfsson and Andersen, 2010). Recordings were done using a patch-clamp amplifier (3900A; Dagan Corporation), filtered at 2 kHz, and acquired at a 20-kHz digitization rate. Data acquisition, post-acquisition filtering, and analysis were done using a program written in Visual Basic (Microsoft).

TABLE S1  
gA analogues used in this study

| Analogue             | Sequence <sup>a</sup>      | Hydrophobic channel length <sup>b</sup> |
|----------------------|----------------------------|-----------------------------------------|
|                      |                            | nm                                      |
| gA <sup>-</sup> (13) | f- <u>ALAVVVWLW</u> LW-e   | 1.9                                     |
| gA(15)               | f- <u>AGALAVVVWLW</u> LW-e | 2.2                                     |

<sup>a</sup>The underlined residues are D amino acids; f is formyl, and e is ethanolamine.

<sup>b</sup>The hydrophobic length of the 15–amino acid gA channel is from Elliott et al. (1983); the length of gA<sup>-</sup>(13) was adjusted by 0.3 nm per pair of L–D residues.

## REFERENCES

- Elliott, J.R., D. Needham, J.P. Dilger, and D.A. Haydon. 1983. The effects of bilayer thickness and tension on gramicidin single-channel lifetime. *Biochim. Biophys. Acta.* 735:95–103. doi:10.1016/0005-2736(83)90264-X
- Ingólfsson, H.I., and O.S. Andersen. 2010. Screening for small molecules' bilayer-modifying potential using a gramicidin-based fluorescence assay. *Assay Drug Dev. Technol.* 8:427–436. doi:10.1089/adt.2009.0250

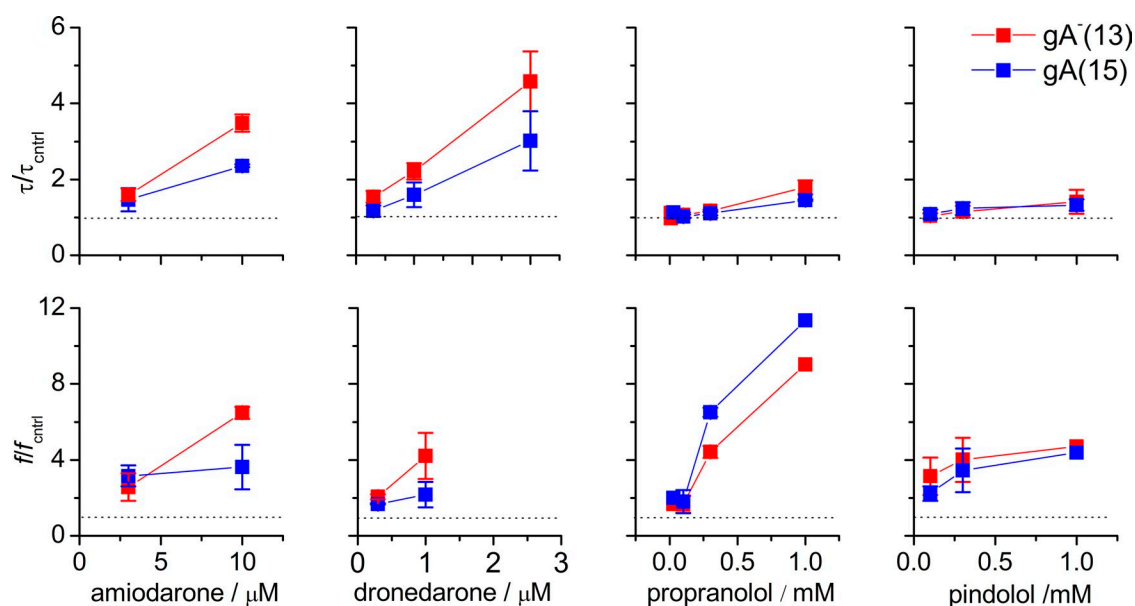

**Figure S1.** Antiarrhythmic drugs increase  $\tau$  and  $f$  for gA<sup>-</sup>(13) (red squares) and gA(15) (blue squares)  $f$  or  $\tau$  recorded in the presence of amiodarone, dronedarone, propranolol, and pindolol at the indicated concentrations and normalized to  $\tau$  value in the absence of the antiarrhythmic. All data points are from  $n = 2 - 4$ , and error bars represent mean  $\pm$  SD if  $n \geq 3$  or mean  $\pm$  range/2 if  $n = 2$ . Frequency measurements with 1 mM pindolol and 30  $\mu\text{M}$  and 1 mM propranolol had  $n = 1$ .

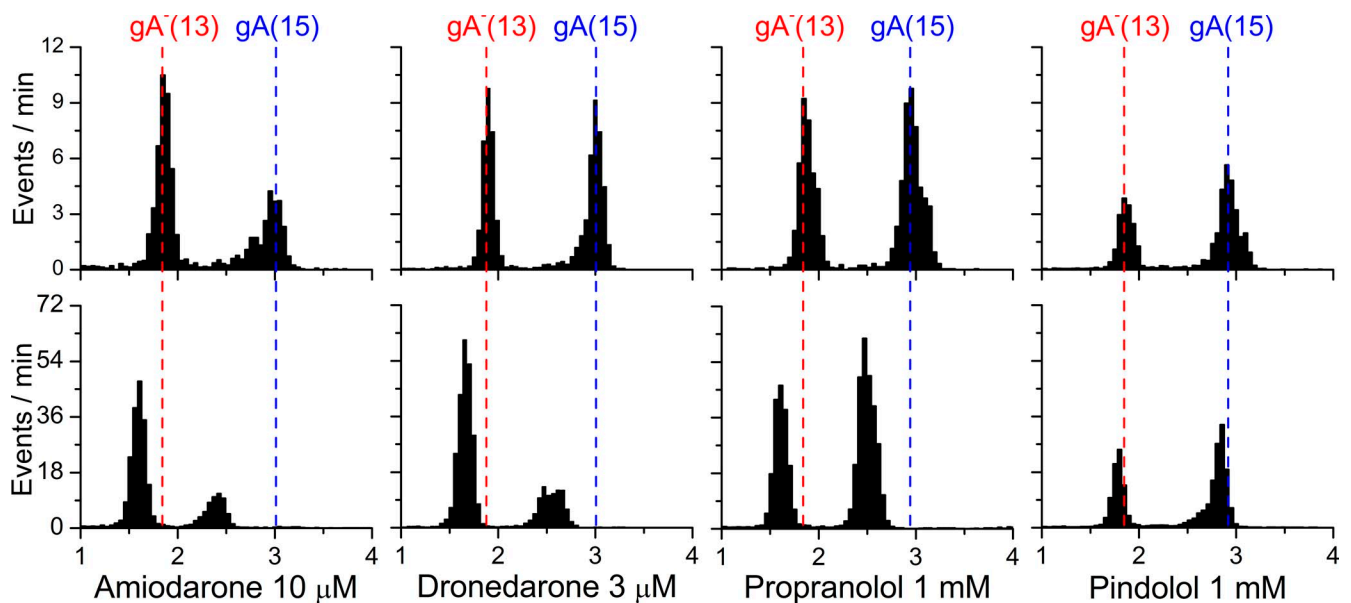

**Figure S2.** Effects of antiarrhythmic drugs on gA single-channel current transition amplitudes. Single-channel current transition amplitude histograms without (top) and with (bottom) amiodarone, dronedarone, propranolol, and pindolol. Red and blue dashed lines indicate the average  $gA^{-}(13)$  and  $gA(15)$  single-channel current amplitudes in the absence of antiarrhythmics, respectively. The histograms are compiled from two to three independent experiments. Amiodarone reduced the current transition amplitudes of  $gA^{-}(13)$  and  $gA(15)$  channels from  $1.86 \pm 0.10$  (mean  $\pm$  SD) in control conditions to  $1.60 \pm 0.08$  and from  $2.92 \pm 0.15$  in control conditions to  $2.37 \pm 0.11$ , respectively. Amiodarone also increased the total number of transitions for both channels from 1,859 to 5,278 and shifted the distribution between  $gA^{-}(13)$  and  $gA(15)$  from 57 and 35% in control conditions to 71 and 24% of total transitions, respectively. Dronedaron reduced the current transition amplitudes of  $gA^{-}(13)$  and  $gA(15)$  channels from  $1.90 \pm 0.07$  (mean  $\pm$  SD) to  $1.66 \pm 0.08$  and from  $2.98 \pm 0.10$  to  $2.54 \pm 0.12$ , respectively. Dronedaron also increased the total number of transitions for both channels from 2,950 to 6,850 and shifted the distribution between  $gA^{-}(13)$  and  $gA(15)$  from 44 and 51% in control to 71 and 27% of total transitions, respectively. Propranolol reduced the current transition amplitudes of  $gA^{-}(13)$  and  $gA(15)$  channels from  $1.88 \pm 0.09$  (mean  $\pm$  SD) in control conditions to  $1.61 \pm 0.08$  and from  $2.97 \pm 0.11$  in control conditions to  $2.49 \pm 0.09$ , respectively. Propranolol also increased the total number of transitions for both channels from 2,451 to 7,536 but, unlike amiodarone and dronedaron, did not shift the distribution between  $gA^{-}(13)$  and  $gA(15)$  channels; the total number of  $gA^{-}(13)$  and  $gA(15)$  appearances distributed as 43 and 54% in control conditions and 39 and 58% in the presence of 1 mM propranolol, respectively. Pindolol modestly reduced the current transition amplitudes of  $gA^{-}(13)$  and  $gA(15)$  channels from  $1.87 \pm 0.08$  (mean  $\pm$  SD) in control conditions to  $1.78 \pm 0.08$  and from  $2.92 \pm 0.12$  in control conditions to  $2.80 \pm 0.11$ , respectively. Pindolol also increased the total number of transitions for both channels from 3,090 to 5,449 but did not shift the distribution between  $gA^{-}(13)$  and  $gA(15)$  channels; the total number of  $gA^{-}(13)$  and  $gA(15)$  appearances distributed as 35 and 60% in control conditions and 36 and 57% in the presence of 1 mM pindolol, respectively. We can account for >90% of the channels in the two major peaks, and the antiarrhythmic drugs did not increase the noise in current transition amplitudes. Average current transition amplitudes were determined using weighted statistics by dividing the area of each  $gA$  peak by the number of transitions in the peak.

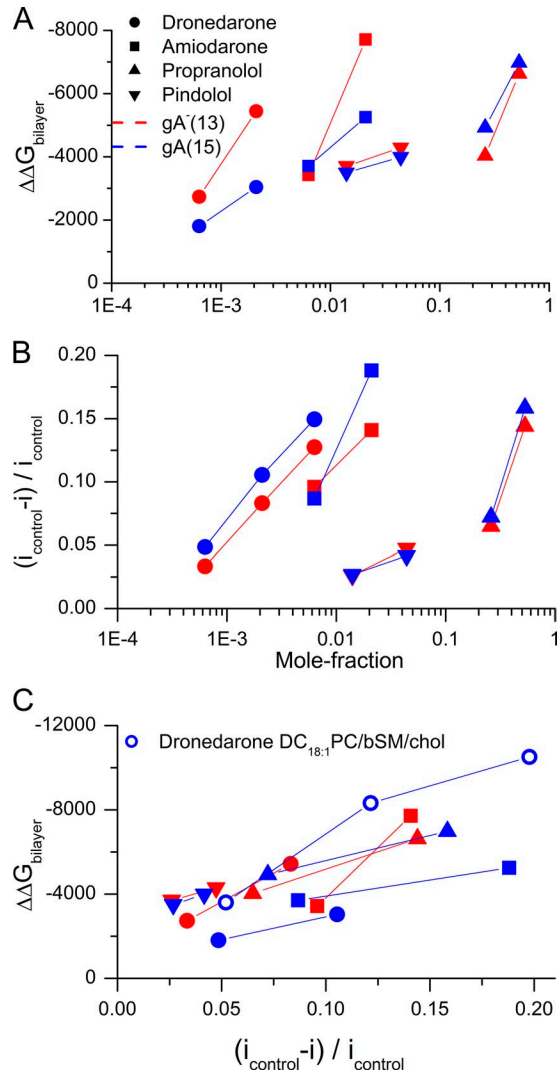

**Figure S3.** (A) Plot of  $\Delta\Delta G_{\text{bilayer}}^{M \rightarrow D}$  (Eq. 4) as a function of the mole fraction of antiarrhythmics in the bilayer. (B) Relative changes in current transition amplitudes (the average current transition amplitude in the absence of the drug [ $i_{\text{control}}$ ] minus the average current transition amplitude in the presence of the drug [ $i$ ] divided by  $i_{\text{control}}$ ). Red symbols and lines designate the values for  $gA^-(13)$  channels, and the blue lines and symbols designate the values for  $gA(15)$  channels. (C) Plot of  $\Delta\Delta G_{\text{bilayer}}^{M \rightarrow D}$  as a function of  $(i_{\text{control}} - i) / i_{\text{control}}$ . Symbols as in A, with red symbols and lines designating the values for  $gA^-(13)$  channels, and blue lines and symbols designating the values for  $gA(15)$  channels. The open blue circle denotes results obtained with dronedarone in  $DC_{18:1}/bSM/Chol$  membranes.

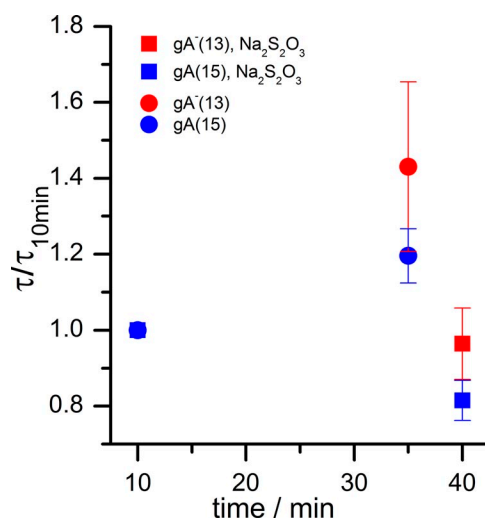

**Figure S4.** Amiodarone's modulation of the gA single-channel lifetimes increases with time in the absence, but not in the presence, of the iodine scavenger  $\text{Na}_2\text{S}_2\text{O}_3$  ( $50 \mu\text{M}$ ). The single-channel lifetimes of  $\text{gA}^-(13)$  and  $\text{gA}(15)$  channels were determined after 10- and 35- or 40-min incubation with  $3 \mu\text{M}$  amiodarone. Data points represent  $\tau$  normalized to the  $\tau$  after a 10-min incubation.  $n = 2$ , and error bars represent mean  $\pm$  range/2. Iodine alone did not alter  $\tau$ . In the presence of  $3 \mu\text{M}$   $\text{I}_2$ , the relative changes in  $\tau$  were  $1.2 \pm 0.1$  and  $1.0 \pm 0.2$  for  $\text{gA}^-(13)$  and  $\text{gA}(15)$ , respectively, which were not significantly different from control.

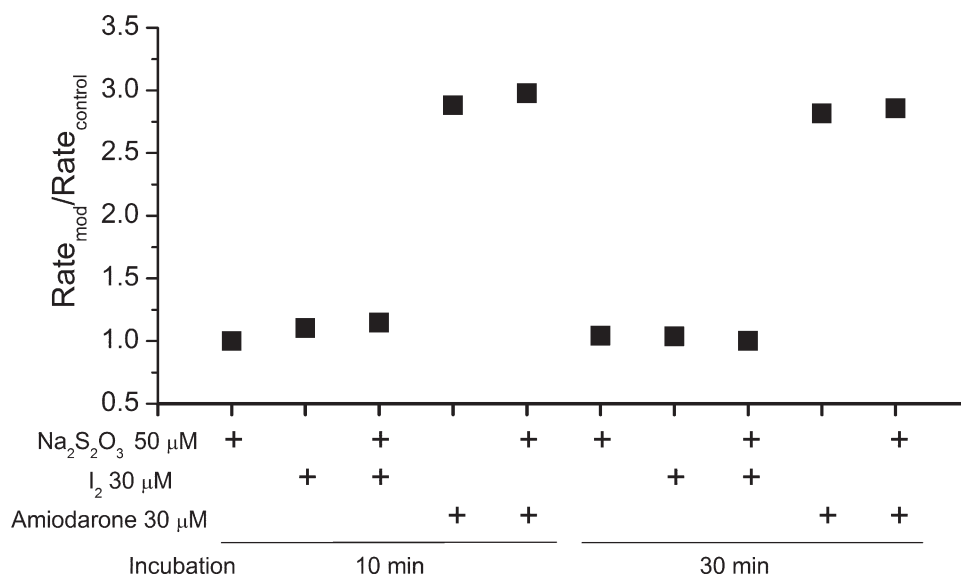

**Figure S5.** Amiodarone does not produce time-dependent increases in quench rate in the absence or presence of the  $\text{I}_2$  scavenger  $\text{Na}_2\text{S}_2\text{O}_3$ . gA-containing LUVs were incubated with  $30 \mu\text{M}$  amiodarone in the presence or absence of  $50 \mu\text{M}$   $\text{Na}_2\text{S}_2\text{O}_3$  for 10 or 30 min. The relative increases in rates were indistinguishable, within instrumental error, indicating no time-dependent amiodarone effects. Incubation with  $30 \mu\text{M}$   $\text{I}_2$  in the presence or absence of  $50 \mu\text{M}$   $\text{Na}_2\text{S}_2\text{O}_3$  for 10 or 30 min yielded rates that were indistinguishable from control, indicating that  $\text{I}_2$  by itself does not affect the bilayer at this concentration.  $n = 1$ .
